# Supplementary material
Source: HighWire-hosted journal article supplement (https://www.annfammed.org/highwire/filestream/13490/field_highwire_adjunct_files/0/visual_abstract.pdf)

## Visual abstract

Waits JB, Smith L, Hurst D. Effect of access to obstetrical care in rural Alabama on perinatal, neonatal, and infant outcomes: 2003-2017. *Ann Fam Med*. 2020;18(5):446-451.

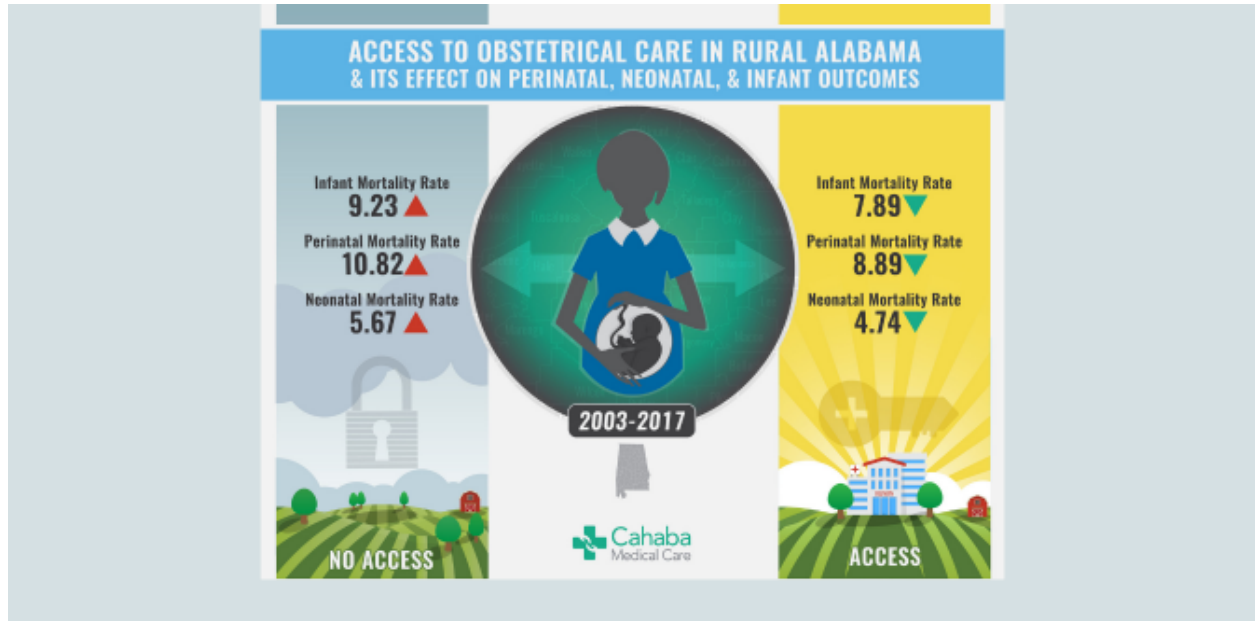

Supplement: visual_abstract.pdf [file visual_abstract.pdf]
